# Supplementary material
Source: Springer Nature journal article supplement (https://www.springermedizin.de/resource/supplementary/13063_2014_2397_MOESM3_ESM.pdf/9622012)
Supplement: MOESM3 [file 9622012]

Hand out patient information

Consent of adolescent patients and their parents

Randomisation

Intervention group

Control group

Informed consent, gathering of baseline data ,  
1<sup>st</sup> issuing of questionnaires (T0)

Gathering of clinical data  
/ laboratory values for eCRF  
2<sup>nd</sup> issuing of questionnaires (T1, 12 months)

T R A N S F E R

Recording and contacting of physicians  
to whom transfers are made

Collection of clinical data  
and laboratory values for eCRF  
2<sup>nd</sup> issuing of questionnaires (T2, 24 months)

Pediatric outpatient clinic

Internist outpatient clinic

Participation in the „BerlinerTransitionsProgramm“  
Transition by means of smartphone / app

Medical treatment according to normal center  
standard

**TRANSNephro 2<sup>nd</sup> phase**
